# Supplementary material for: A MnO2 nanosheet-mediated CRISPR/Cas12a system for the detection of organophosphorus pesticides in environmental water
Source: Royal Society of Chemistry journal article supplement (doi:10.1039/d3an02020g), 2023-12-04
Supplement: d3an02020g1.pdf [file d3an02020g1.pdf]

## Electronic supplementary information

### **MnO<sub>2</sub> nanosheets-mediated CRISPR/Cas12a for detection of organophosphorus pesticide in environment water†**

Hao-Ming Yu,<sup>a</sup> Guo-Xi Liang,<sup>a</sup> Hui-Yi Wang,<sup>b</sup> Xiao-Min Hang,<sup>b</sup> Hong-Hong Wang,<sup>b</sup>  
Jia-Xin Peng<sup>b</sup> and Li Wang<sup>\*b</sup>

<sup>a</sup> School of the Environment and Safety Engineering, Jiangsu University, Zhenjiang 212013, P. R. China

<sup>b</sup> School of Pharmacy, Jiangsu University, Zhenjiang 212013, P. R. China

\* Corresponding author. Email address: wangjill@126.com (Li Wang)

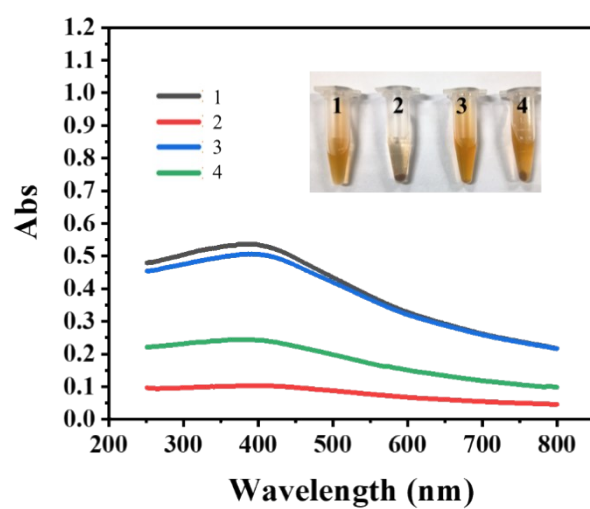

**Fig. S1.** The UV-vis spectra of MnO<sub>2</sub> nanosheets under different conditions: (1), MnO<sub>2</sub> nanosheets in ultra-pure water; (2), MnO<sub>2</sub> nanosheets in NaCl solution; (3), MnO<sub>2</sub>-activator in NaCl solution; (4), MnO<sub>2</sub> nanosheets + activator in NaCl solution. Insert is the corresponding photograph.

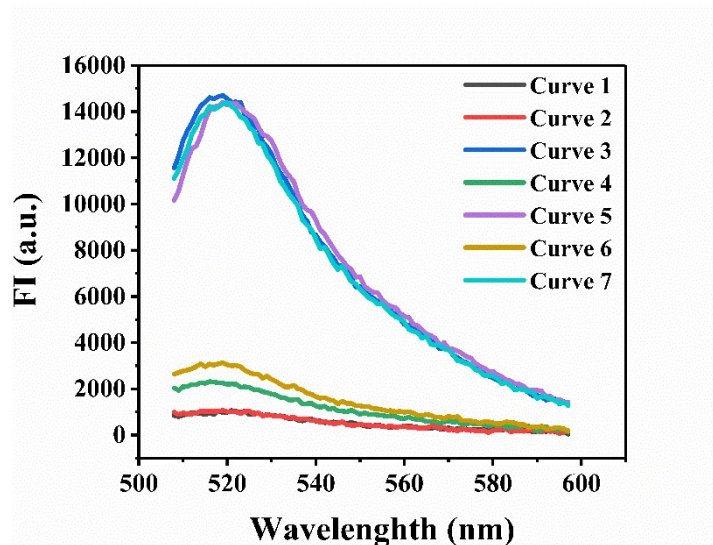

**Fig. S2.** The fluorescence spectra of different samples: Curve 1, FQ reporter; Curve 2, Cas12a/crRNA + FQ reporter; Curve 3, Activator + Cas12a/crRNA + FQ reporter; Curve 4, MnO<sub>2</sub>-activator + Cas12a/crRNA + FQ reporter; Curve 5, AChE + ATCh + MnO<sub>2</sub>-activator + Cas12a/crRNA + FQ reporter; Curve 6, AChE + ATCh + MnO<sub>2</sub>-activator + Cas12a/crRNA + FQ reporter + DDVP; Curve 7, Activator + Cas12a/crRNA + FQ reporter + DDVP. DDVP: 50 µg mL<sup>-1</sup>.

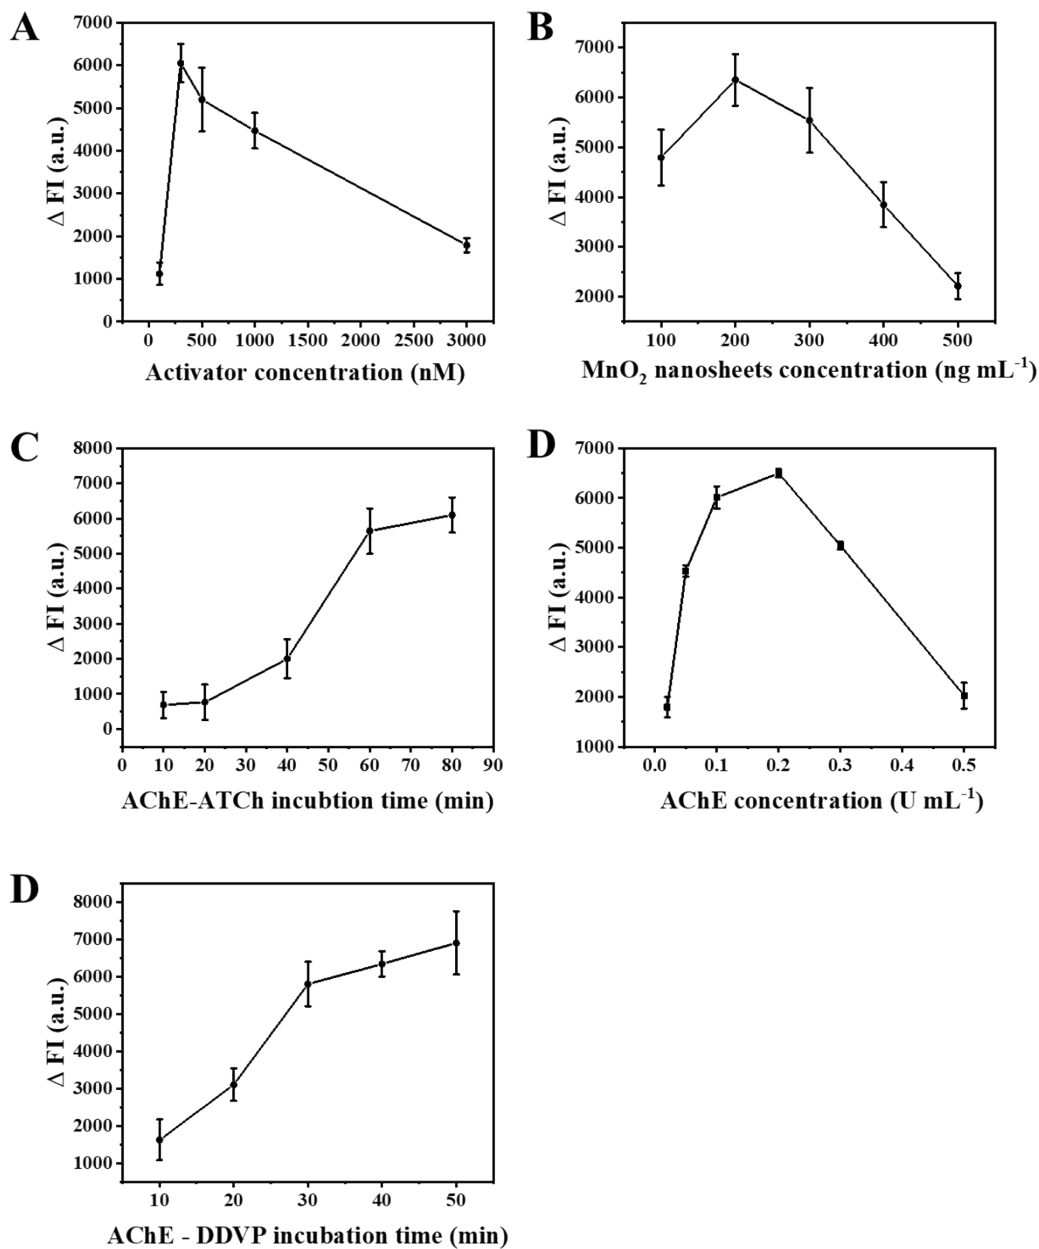

**Fig. S3.** (A) Effect of activator concentration on the sensing performance; (B) Effect of  $MnO_2$  nanosheets concentration on the sensing performance; (C) Effect of AChE-ATCh incubation time on the sensing performance; (D) Effect of AChE concentration on the sensing performance; (E) Effect of AChE-DDVP incubation time on the sensing performance.

**Table S1.** Sequences of oligonucleotides used in this study.

| Name                           | Sequence (5'-3')                                      |
|--------------------------------|-------------------------------------------------------|
| Activator                      | GCT TAG AGT ATA GTA GTT GAT CG                        |
| crRNA                          | UAA UUU CUA CUA AGU GUA GAU AUC AAC UAC UAU ACU CUA A |
| FQ reporter                    | FAM-TTATT-BHQ1                                        |
| Non-specific ssDNA<br>for FAGE | CGC ACC TCG GAA TGT CGC GCA TGG TGC GCA               |

**Table S2.** Comparison between this method and other MnO<sub>2</sub> nanosheets-mediated sensors for DDVP detection.

| Detect method | Linear range                 | LOD                       | References |
|---------------|------------------------------|---------------------------|------------|
| Colorimetry   | 7–600 ng mL <sup>-1</sup>    | 2.3 ng mL <sup>-1</sup>   | [1]        |
| Colorimetry   | 5–60 μM                      | 0.65 μM                   | [2]        |
| Colorimetry   | 0.25–1.0 mM                  | 42.94 μM                  | [3]        |
| Fluorescence  | 10–1000 ng mL <sup>-1</sup>  | 3 ng mL <sup>-1</sup>     | [4]        |
| Fluorescence  | 137–2740 ng mL <sup>-1</sup> | 0.406 ng mL <sup>-1</sup> | [5]        |
| Fluorescence  | 5–1000 ng mL <sup>-1</sup>   | 0.135 ng mL <sup>-1</sup> | This work  |

## References

1. J. Cao, M. Wang, Y. She, A.M. Abd El-Aty, A. Hacımüftüoğlu, J. Wang, M. Yan, S. Hong, S. Lao, Y. Wang, *Microchim. Acta*, 2019, **186**, 390.
2. W.S.T. Tun, C. Talodthaisong, S. Daduang, J. Daduang, K. Rongchai, R. Patramanon, S. Kulchat, *Mater. Chem. Front.*, 2022, **6**, 1487–1498.
3. S. L. D'souza, R. K. Pati, S. K. Kailasa, *Anal. Methods*, 2014, **6**, 9007–9014.
4. B. Lin, Y. Yan, M. Guo, Y. Cao, Y. Yu, T. Zhang, Y. Huang, D. Wu, *Food Chem.*, 2018, **245**, 1176–1182.
5. R. Fu, Y. Wang, Y. Liu, H. Liu, Q. Zhao, Y. Zhang, C. Wang, Z. Li, B. Jiao, Y. He, *Food Chem.*, 2022, **387**, 132919.
